# Supplementary material for: Investigation on Quality Characteristics and Antidiabetic Properties of Mulberry Leaf Fu Brick Tea
Source: Hindawi journal article supplement (doi:10.1155/2024/8826062), 2024-03-29
Supplement: f1 [file 8826062.f1.doc]

**Table S1** SF, F, and S review results

|  | mulberry leaf Fu brick tea (SF) | | | | |  | Fu brick tea(F) | | | | |  | mulberry leaf brick tea(S) | | | | |  |
| --- | --- | --- | --- | --- | --- | --- | --- | --- | --- | --- | --- | --- | --- | --- | --- | --- | --- | --- |
|  | appearance | soup color | aroma | taste | leaf base | score | appearance | soup color | aroma | taste | leaf base | score | appearance | soup color | aroma | taste | leaf base | score |
| Tea reviewer 1 | 91 | 91 | 91 | 93 | 90 | 91.54 | 90 | 90 | 89 | 89 | 90 | 89.52 | 85 | 86 | 80 | 84 | 85 | 82.89 |
| Tea reviewer 2 | 92 | 89 | 88 | 93 | 91 | 89 | 91 | 90 | 88 | 91 | 83 | 84 | 82 | 83 | 83 |
| Tea reviewer 3 | 89 | 90 | 92 | 95 | 89 | 90 | 88 | 87 | 90 | 92 | 86 | 81 | 81 | 82 | 81 |
| Tea reviewer 4 | 88 | 89 | 92 | 94 | 90 | 89 | 89 | 88 | 91 | 89 | 85 | 84 | 84 | 80 | 80 |
| Tea reviewer 5 | 91 | 91 | 93 | 95 | 90 | 91 | 90 | 90 | 90 | 90 | 87 | 85 | 80 | 82 | 83 |

**Table S2** Death and LD50 determination results of SF from a single intragastric administration of ICR mice

| Group | Number of Animals | Dose (g/kg) | Deaths | death rate (%) | LD50 |
| --- | --- | --- | --- | --- | --- |
| Blank control | 10 | — | 0 | 0 | LD50=22.3g/kg，  95% confidence interval：19.3~25.6g/kg |
| Ⅰ | 10 | 14.6 | 0 | 0 |
| Ⅱ | 10 | 18.9 | 4 | 40 |
| Ⅲ | 10 | 24.9 | 5 | 50 |
| Ⅳ | 10 | 32.6 | 10 | 100 |
| Ⅴ | 10 | 42.9 | 10 | 100 |

**Table S3 Effects of SF, F, and S on the body weight of model mice(n=10)**

| Group | Before model | After model | 1week | 2week | 3week | 4week |
| --- | --- | --- | --- | --- | --- | --- |
| CON | 20.98±0.72a | 23.41±0.69a | 24.23±0.97a | 24.72±1.26a | 24.95±1.43a | 25.44±1.83a |
| DB | 20.88±0.92a | 19.10±1.01b | 18.46±0.75b | 18.01±0.63b | 17.03±1.42c | 16.89±1.48c |
| MET | 20.93±0.67a | 19.97±0.99b | 19.35±1.18b | 18.95±0.74b | 19.09±1.00b | 18.6±1.47b |
| SF | 21.33±0.72a | 20.00±1.02b | 19.27±1.00b | 18.9±0.82b | 18.53±0.97b | 18.86±1.22b |
| F | 21.34±0.56a | 20.02±0.56b | 19.09±1.43b | 18.94±1.38b | 19.21±1.39b | 18.62±1.34b |
| S | 20.91±0.45a | 19.37±0.66b | 18.69±1.64b | 18.61±1.47b | 18.39±1.71b | 17.78±2.10bc |

Note: normal control group (CON); model (DB); positive drug (MET); mulberry Fu brick tea (SF); Fu brick tea (F) and mulberry brick tea (S). Different letter indicate significant differences(*p＜0.05*). The same letter indicate that the difference is not significant.


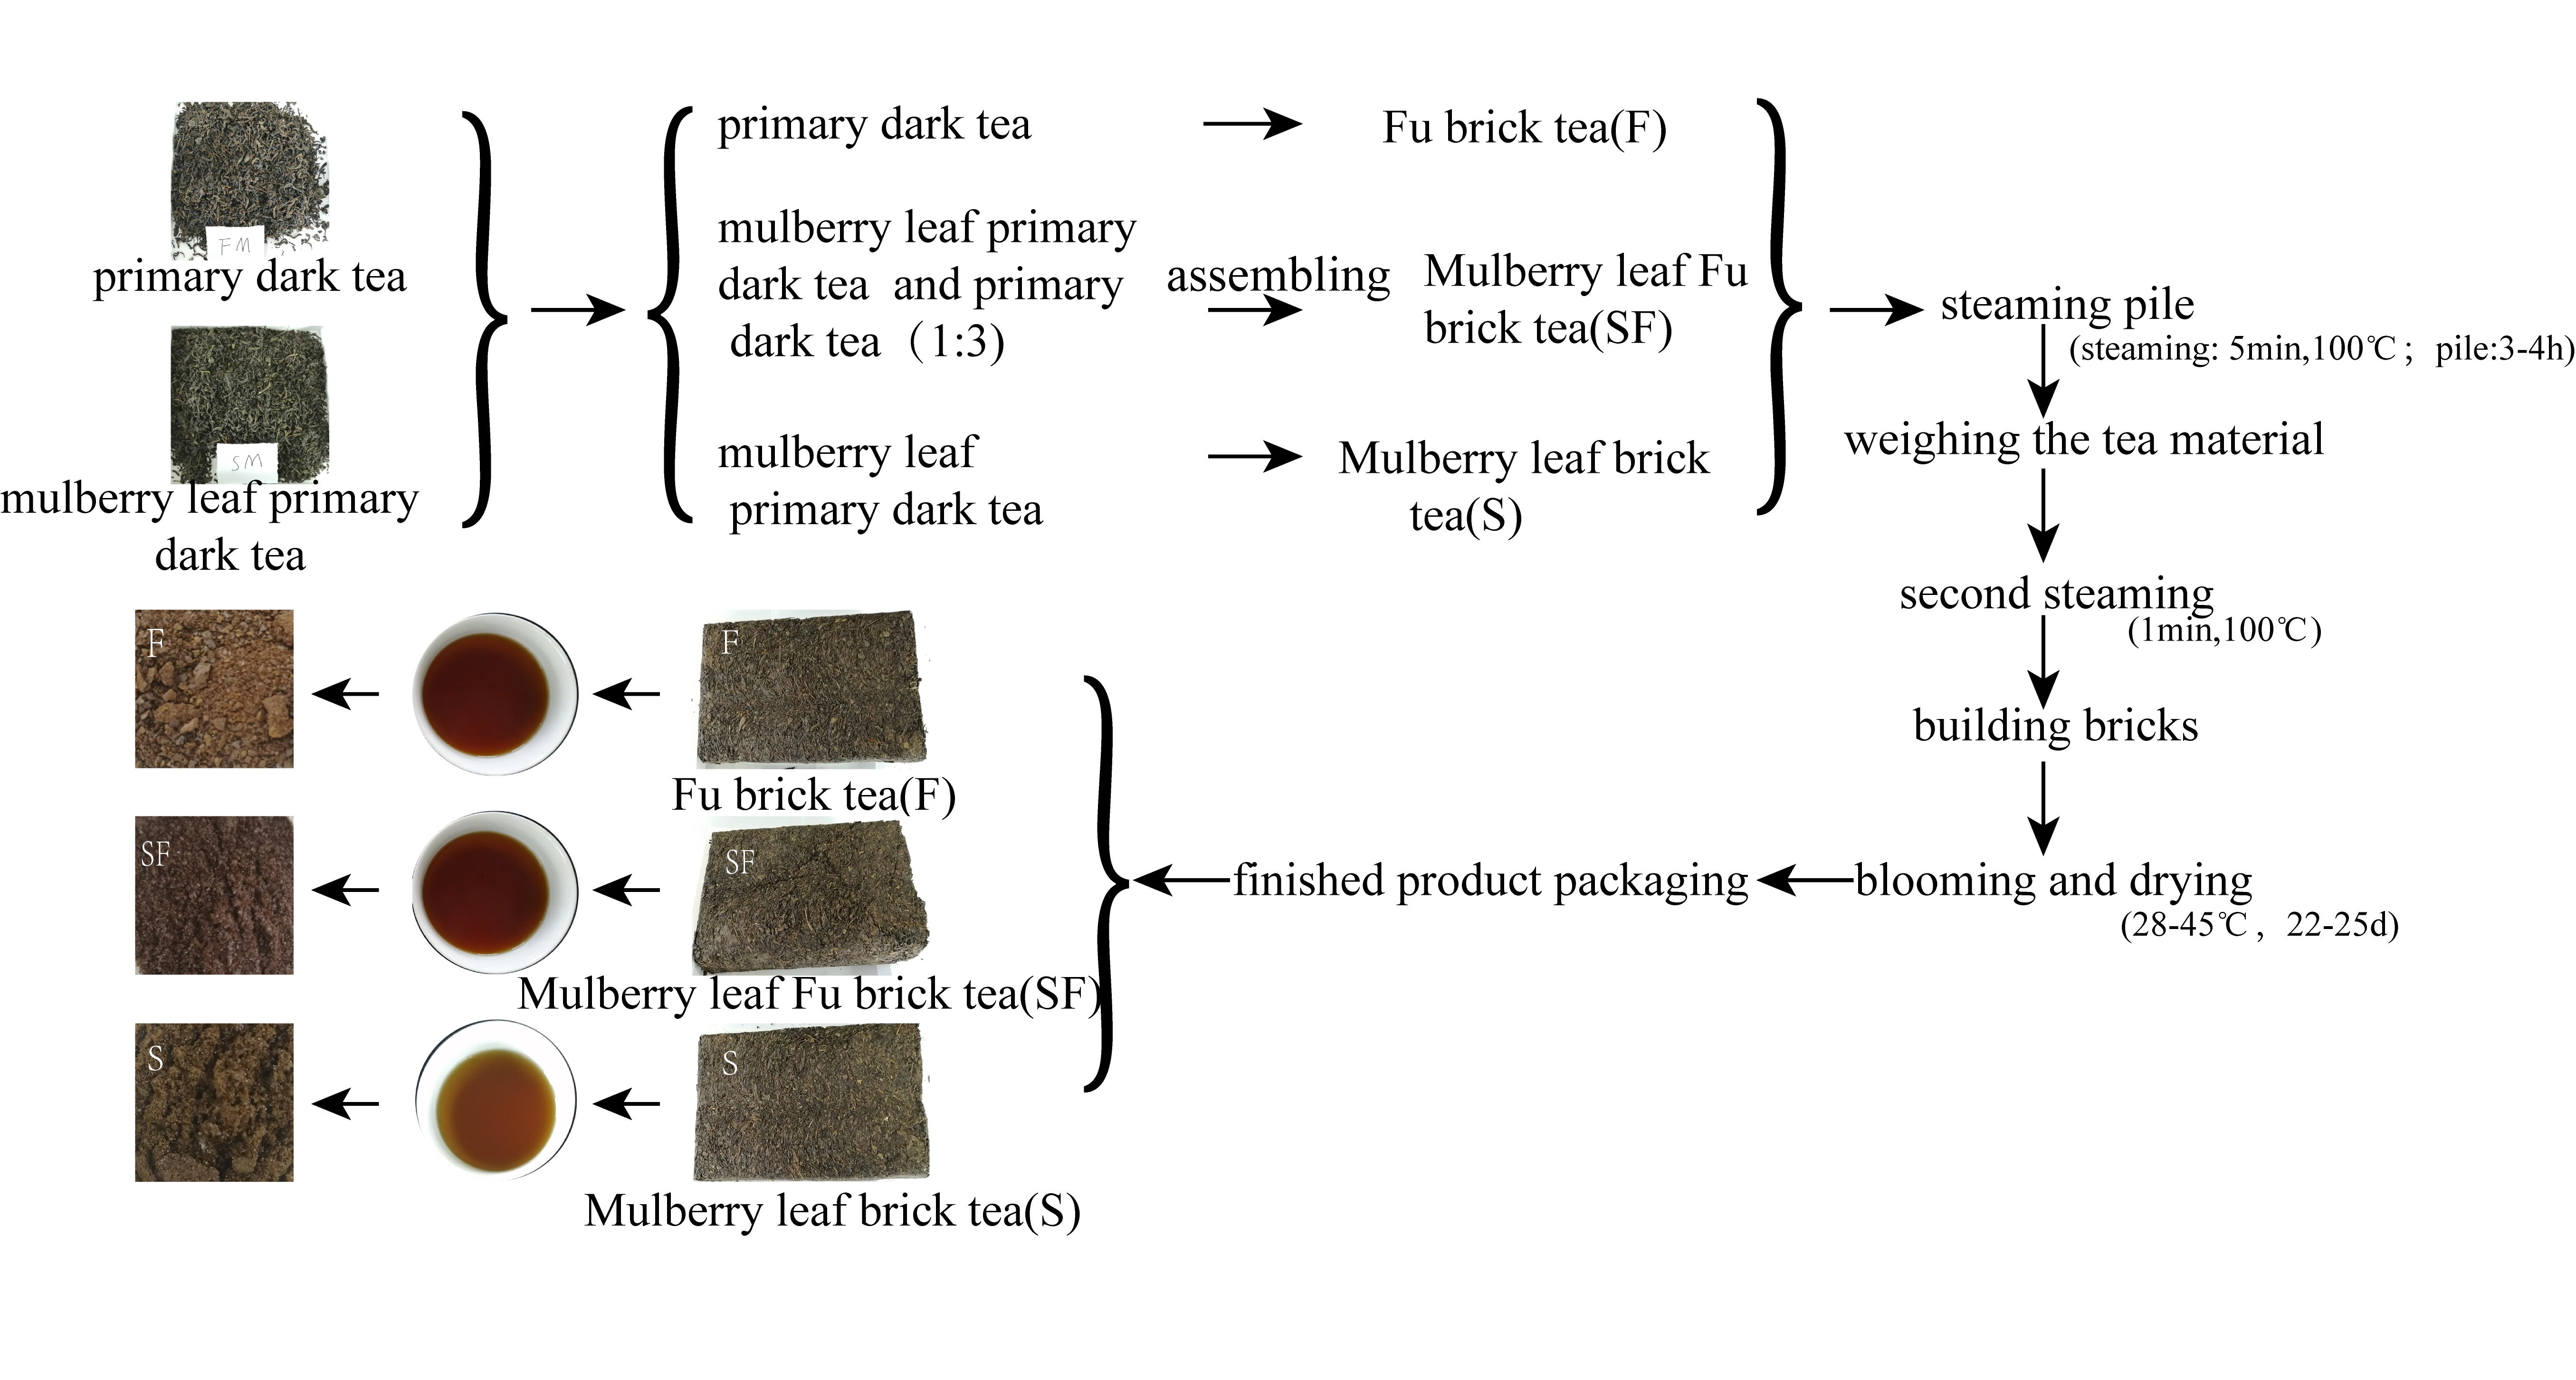
**Figure**. **S1** The production process of SF, F, and S
